# Supplementary material for: HeRA: an atlas of enhancer RNAs across human tissues
Source: PubMed Central journal article supplement (PMC7779069; doi:10.1093/nar/gkaa940), 2020-10-29
Supplement: gkaa940_supplemental_file.pdf [file gkaa940_supplemental_file.pdf]

# Figure S1

A

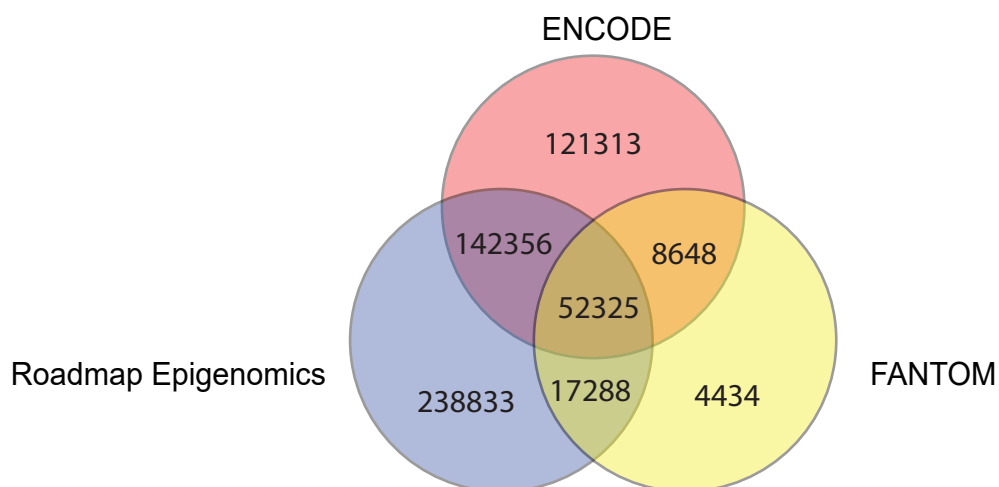

B

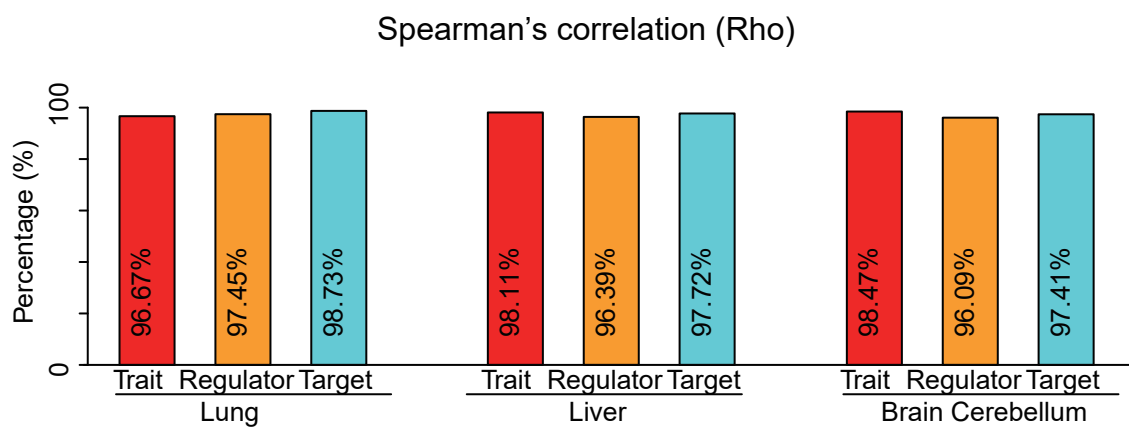

Figure S1. (A) Number of enhancer annotated in ENCODE, FANTOM and Roadmap Epigenomics. (B) Percentage of consistent instances between RPM and quantile normalized expression in three tissues.

# Figure S2

## A

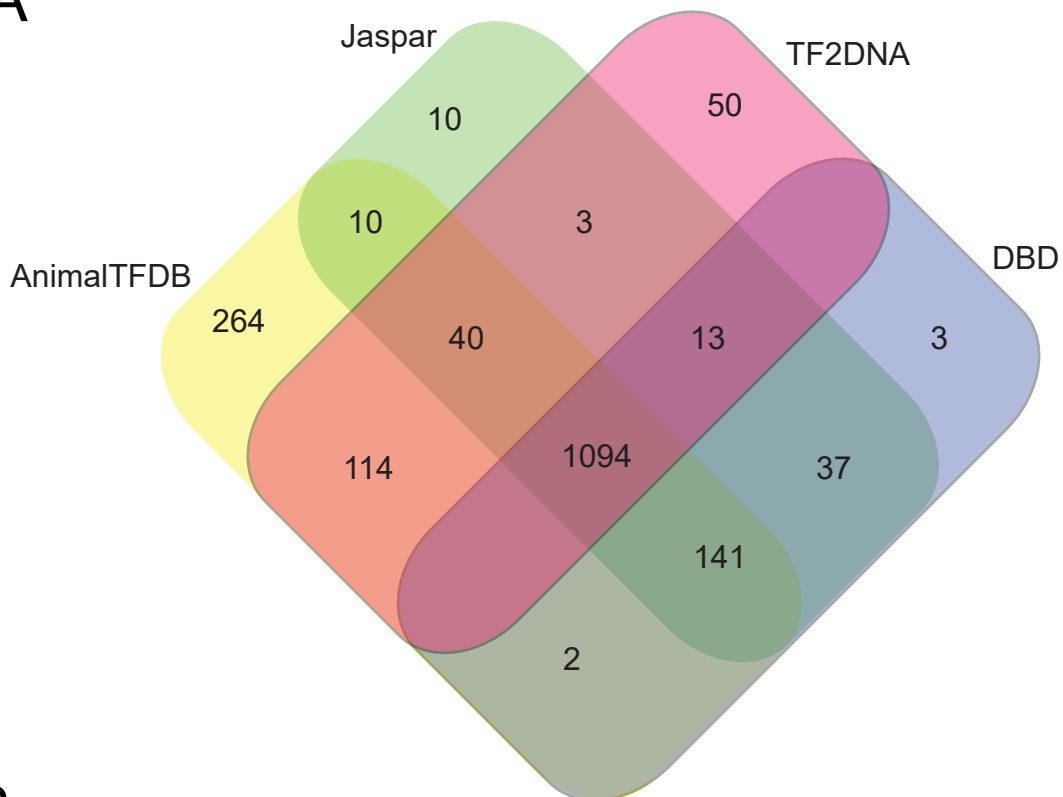

## B

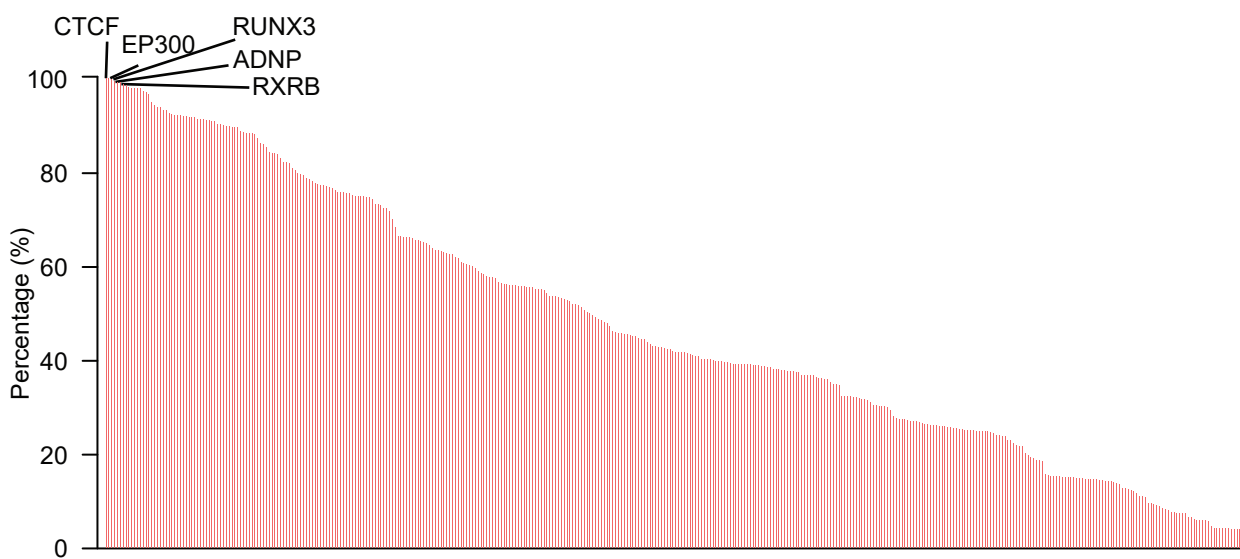

C

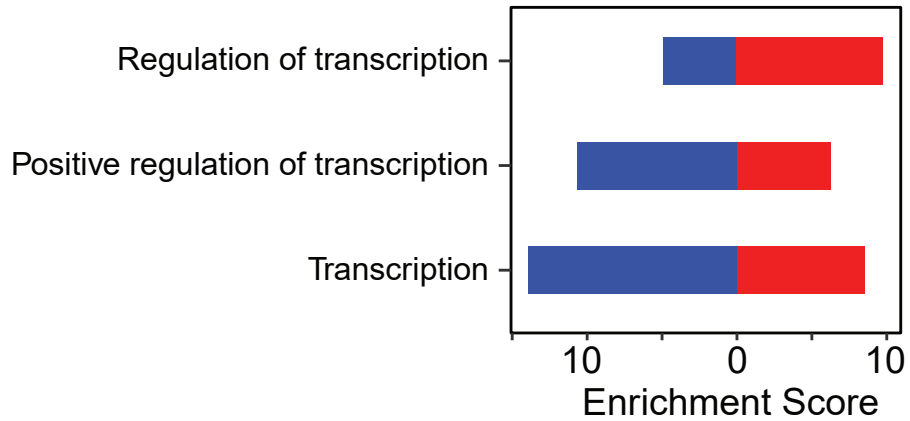

Figure S2. (A) Number of TF annotated in Jaspar, AnimalTFDB, TF2DNA and DBD. (B) Percentage of eRNA-TF pairs with TFBS evidences. X-axis denotes TFs. Y-axis denotes to the percentage of co-expressed eRNA-TF pairs for each TF. (C) Top 3 enrichment GO items of top 30% TFs with higher (red)/lower (blue) TFBS discovery rates.

# Figure S3

## A

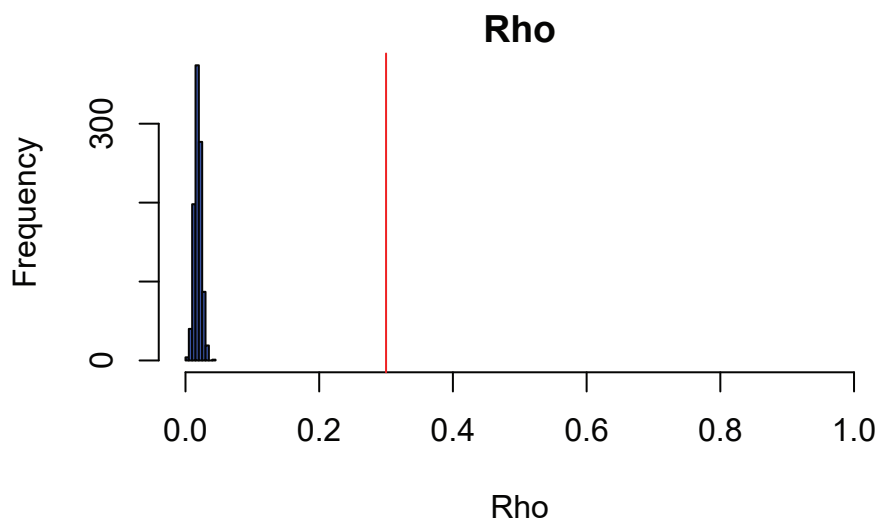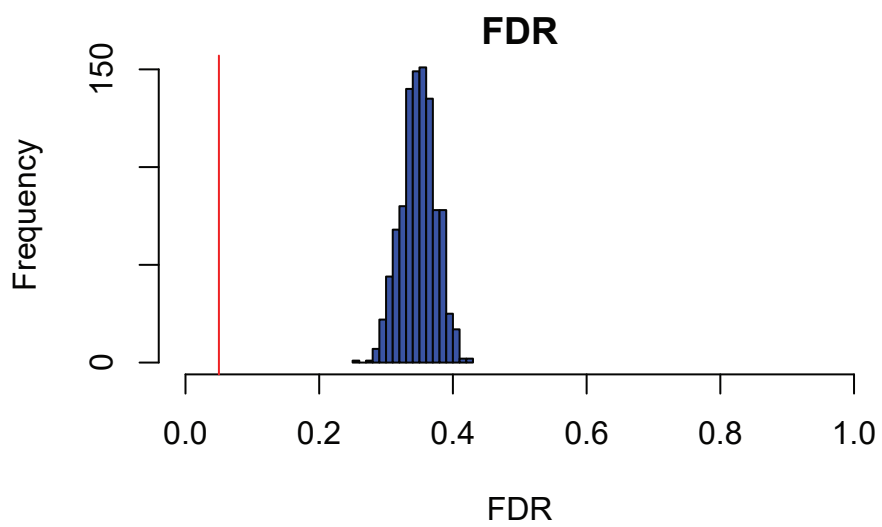

**B**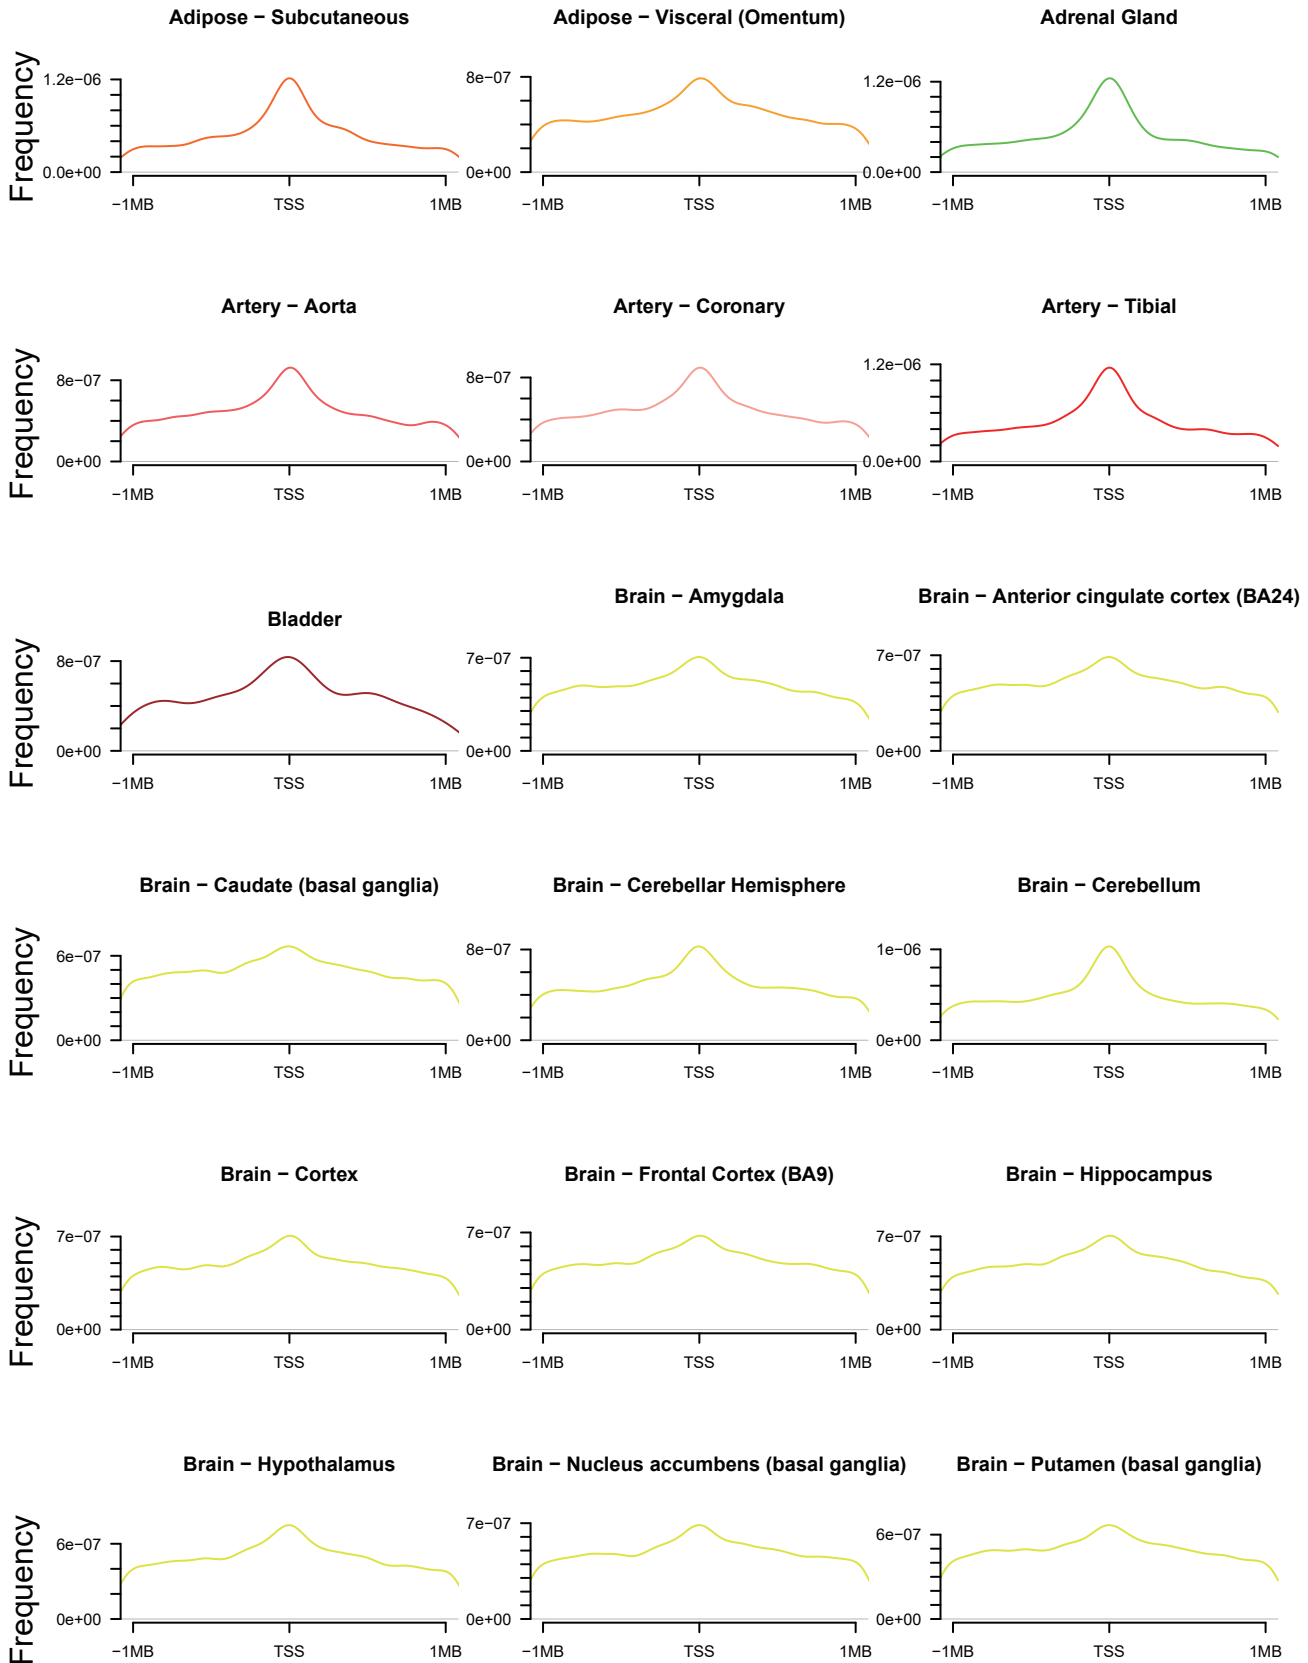

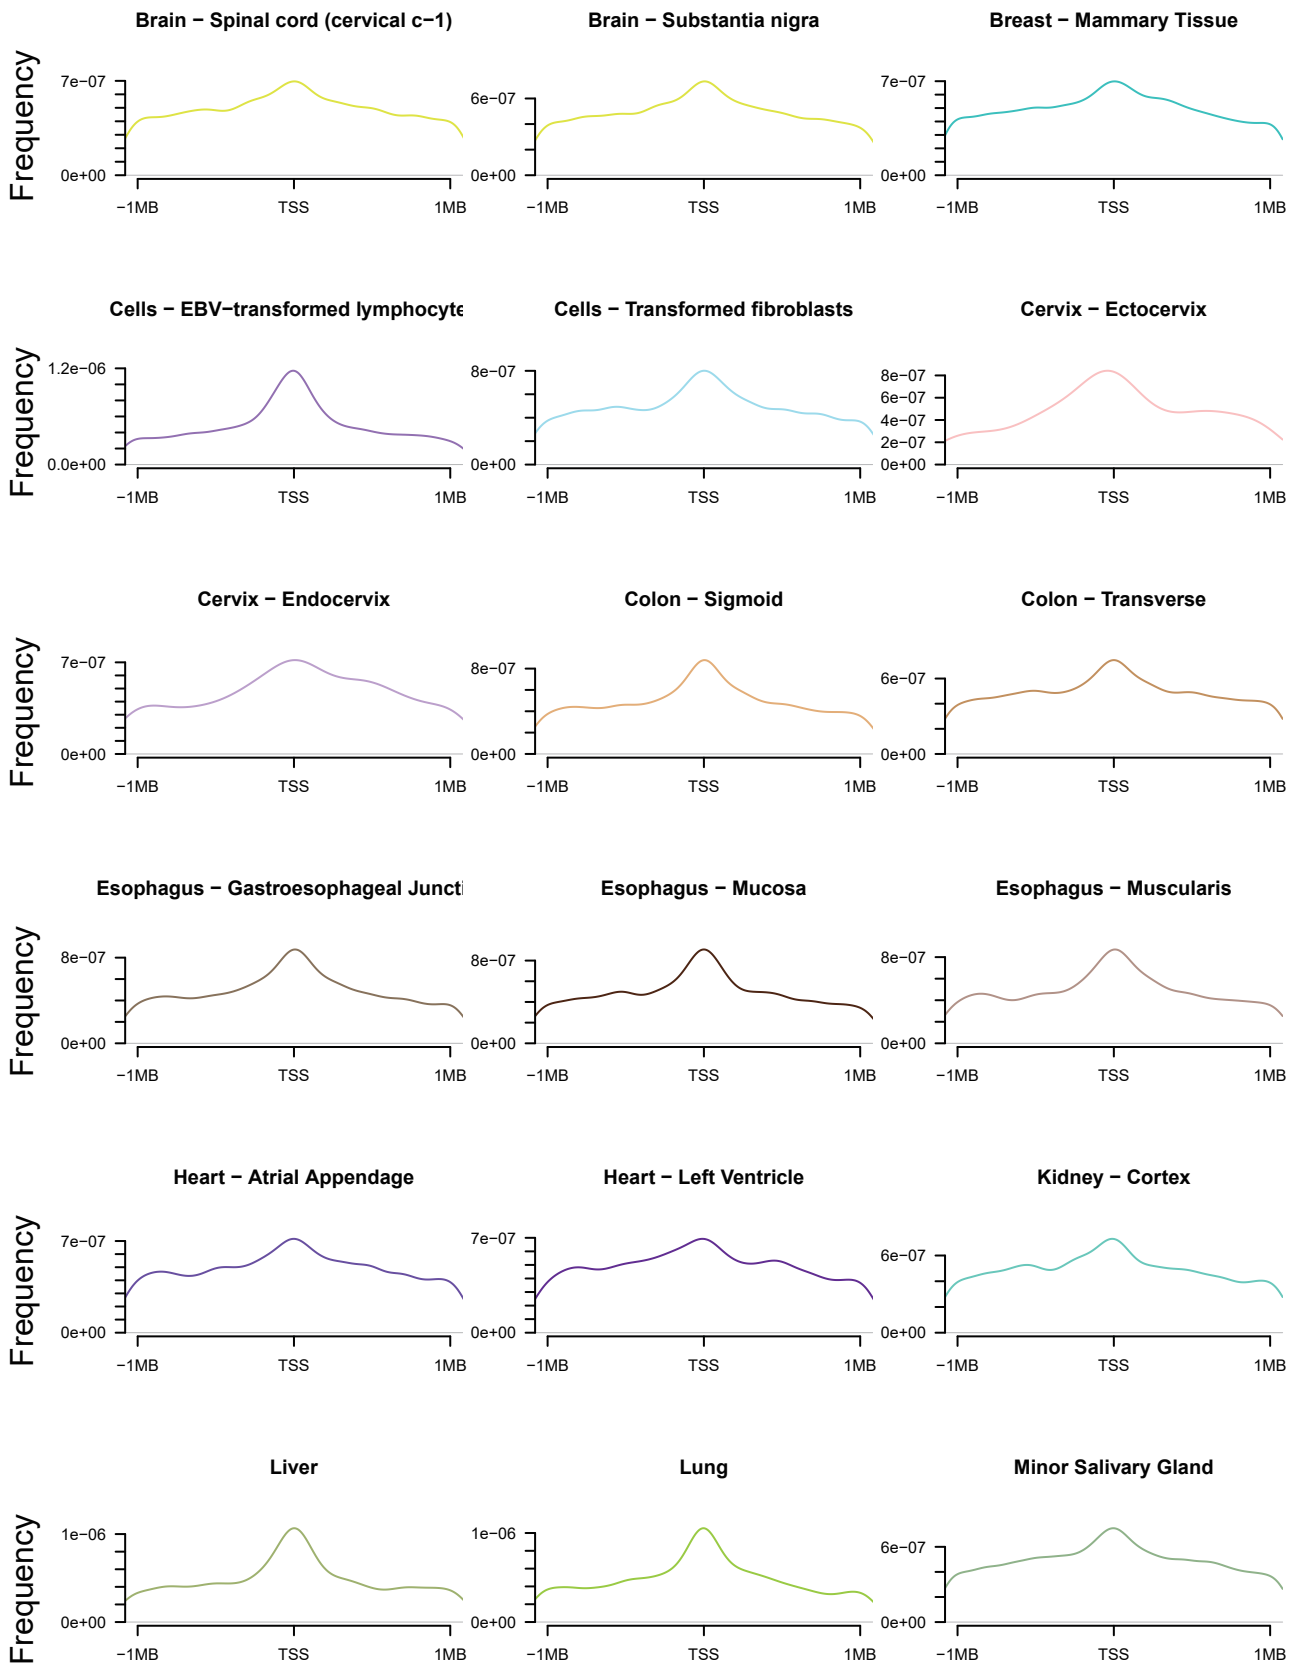

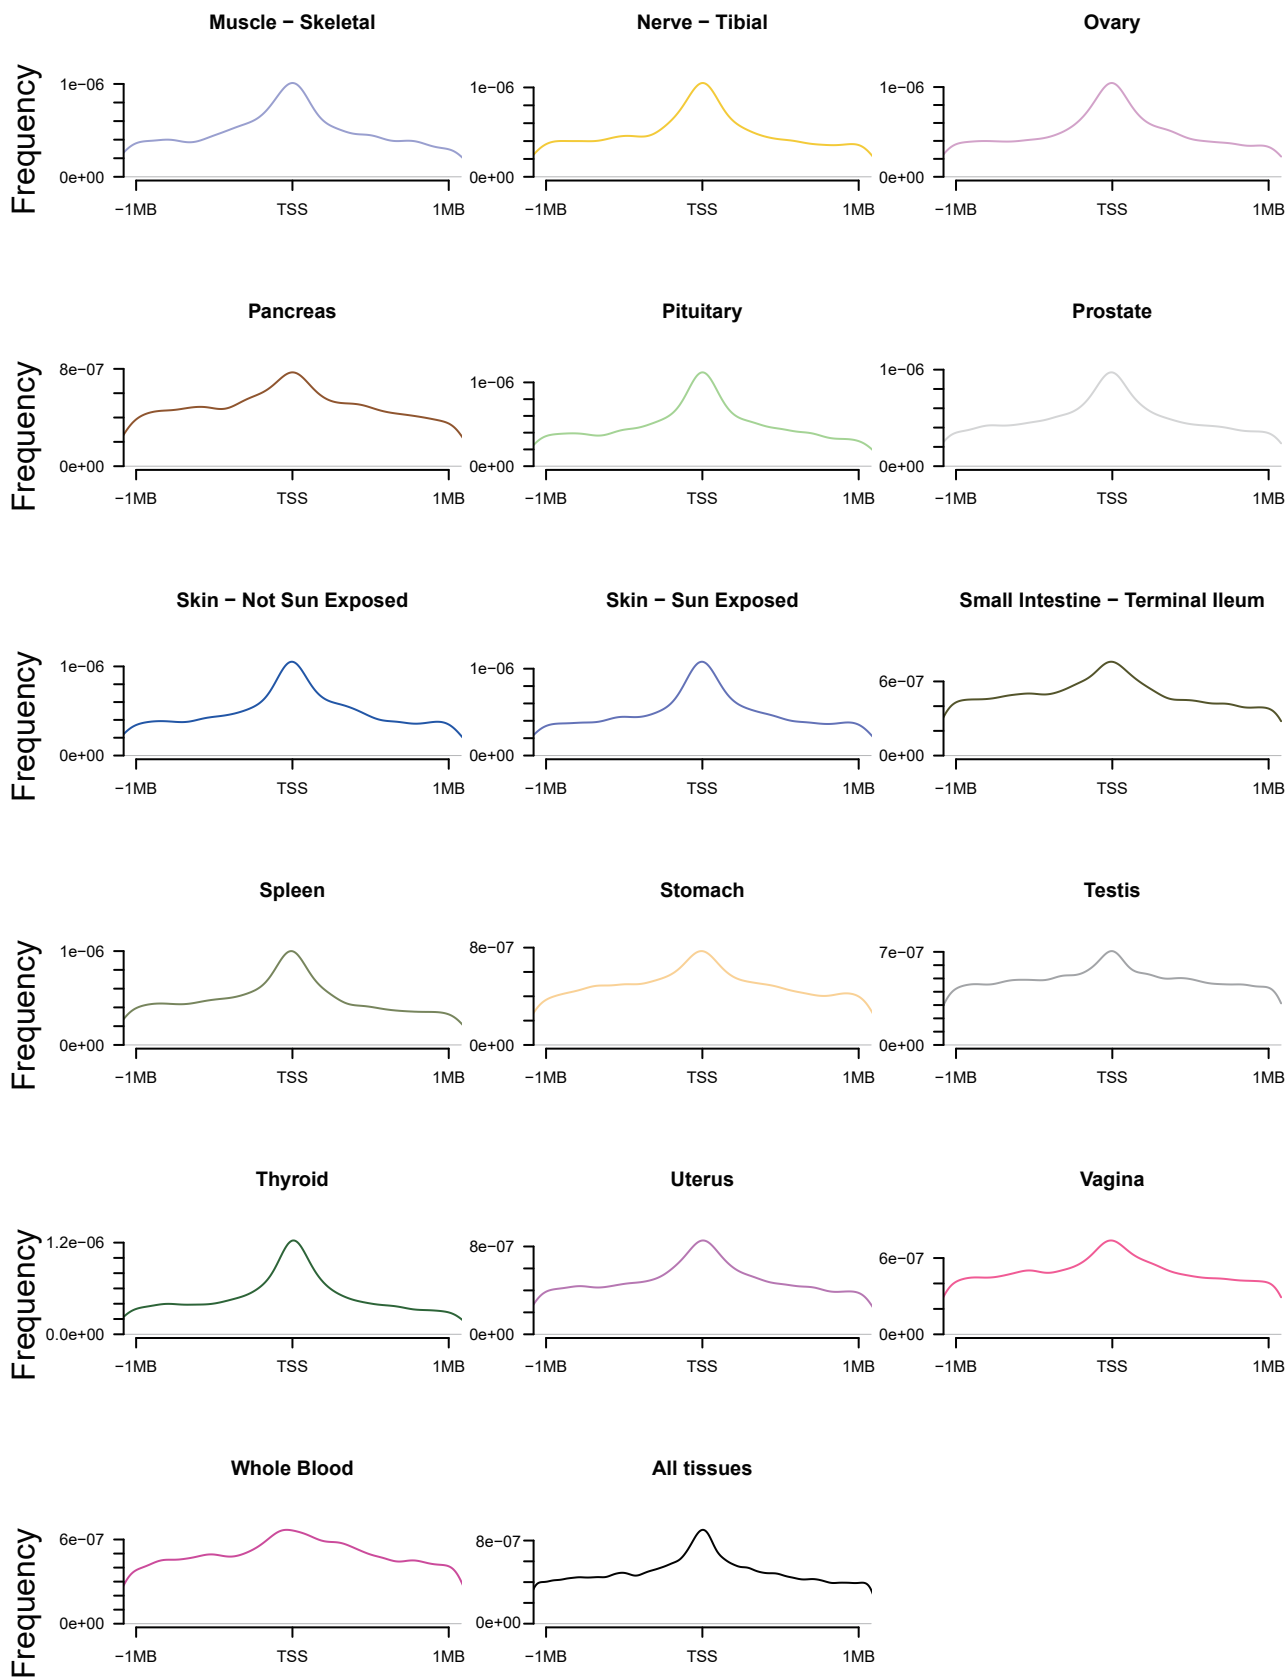

Figure S3. (A) Distribution of correlation (blue histogram) for interchromosomal eRNA-target gene pair of Rho (upper panel) and FDR (bottom panel) pair. Red line indicates our cutoff for eRNA-target gene pair. (B) Distribution between eRNA-gene association and distances across tissues. Y-axis denotes frequency.

# Figure S4

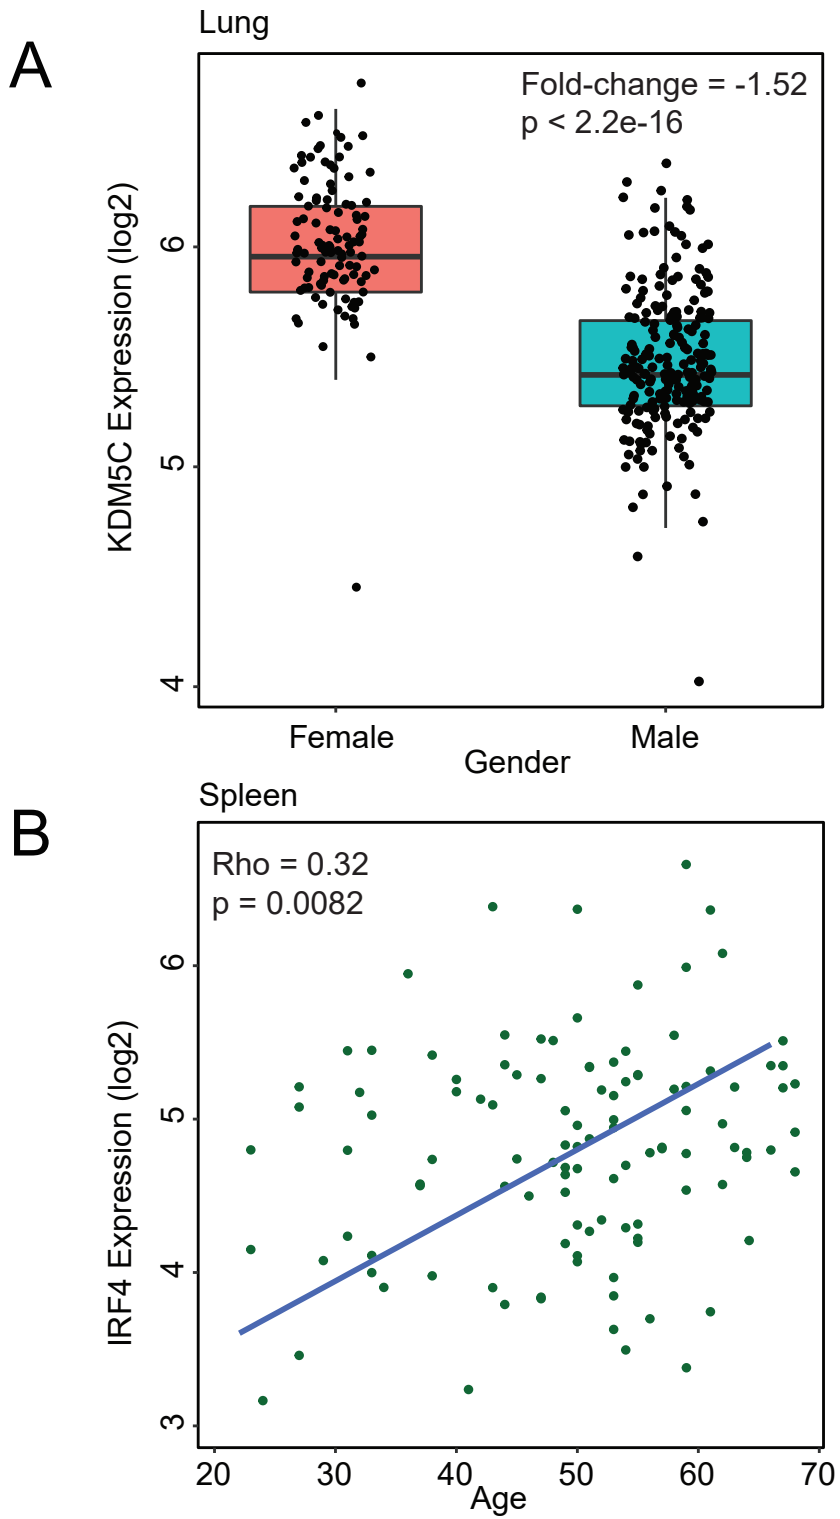

Figure S4. (A) Differential expression of KDM5C in lung tissue between females and males. (B) Significant correlation of IRF4 with age in splenic tissue.



Supplementary Table S1. Summary of sample size, detectable eRNAs, and trait-related eRNAs across tissues

| Tissue                                    | Sample |              | Number of trait-related eRNAs |
|-------------------------------------------|--------|--------------|-------------------------------|
|                                           | Size   | No. of eRNAs |                               |
| Adipose - Subcutaneous                    | 385    | 5103         | 698                           |
| Adipose - Visceral (Omentum)              | 235    | 4836         | 380                           |
| Adrenal Gland                             | 161    | 3877         | 44                            |
| Artery - Aorta                            | 248    | 5540         | 272                           |
| Artery - Coronary                         | 141    | 5301         | 96                            |
| Artery - Tibial                           | 361    | 4519         | 725                           |
| Bladder                                   | 12     | 4881         | 0                             |
| Brain - Amygdala                          | 83     | 2788         | 509                           |
| Brain - Anterior cingulate cortex (BA24)  | 100    | 3278         | 82                            |
| Brain - Caudate (basal ganglia)           | 135    | 3704         | 10                            |
| Brain - Cerebellar Hemisphere             | 120    | 8840         | 304                           |
| Brain - Cerebellum                        | 147    | 12602        | 131                           |
| Brain - Cortex                            | 133    | 4310         | 263                           |
| Brain - Frontal Cortex (BA9)              | 122    | 3643         | 131                           |
| Brain - Hippocampus                       | 104    | 3116         | 212                           |
| Brain - Hypothalamus                      | 104    | 3479         | 314                           |
| Brain - Nucleus accumbens (basal ganglia) | 125    | 4111         | 3                             |
| Brain - Putamen (basal ganglia)           | 105    | 3383         | 1                             |
| Brain - Spinal cord (cervical c-1)        | 76     | 3365         | 1                             |
| Brain - Substantia nigra                  | 72     | 2870         | 5                             |
| Breast - Mammary Tissue                   | 221    | 6629         | 679                           |
| Cells - EBV-transformed lymphocytes       | 138    | 5992         | 82                            |
| Cells - Leukemia cell line (CML)          | 102    | 5931         | 0                             |
| Cells - Transformed fibroblasts           | 305    | 3996         | 91                            |
| Cervix - Ectocervix                       | 6      | 2917         | 0                             |
| Cervix - Endocervix                       | 5      | 3140         | 0                             |
| Colon - Sigmoid                           | 175    | 5217         | 288                           |
| Colon - Transverse                        | 207    | 5004         | 29                            |
| Esophagus - Gastroesophageal Junction     | 177    | 5233         | 497                           |
| Esophagus - Mucosa                        | 338    | 4629         | 155                           |
| Esophagus - Muscularis                    | 288    | 4578         | 57                            |
| Fallopian Tube                            | 7      | 2348         | 0                             |
| Heart - Atrial Appendage                  | 219    | 3877         | 53                            |
| Heart - Left Ventricle                    | 274    | 2069         | 42                            |
| Kidney - Cortex                           | 38     | 3567         | 0                             |
| Liver                                     | 141    | 3178         | 212                           |
| Lung                                      | 379    | 6496         | 120                           |
| Minor Salivary Gland                      | 71     | 6704         | 31                            |
| Muscle - Skeletal                         | 477    | 2819         | 210                           |

|                                  |     |       |      |
|----------------------------------|-----|-------|------|
| Nerve - Tibial                   | 328 | 8032  | 588  |
| Ovary                            | 112 | 7278  | 226  |
| Pancreas                         | 203 | 3379  | 25   |
| Pituitary                        | 126 | 6944  | 42   |
| Prostate                         | 120 | 7721  | 370  |
| Skin - Not Sun Exposed           | 270 | 7464  | 1721 |
| Skin - Sun Exposed               | 400 | 6485  | 288  |
| Small Intestine - Terminal Ileum | 106 | 6610  | 14   |
| Spleen                           | 121 | 6945  | 186  |
| Stomach                          | 209 | 3954  | 34   |
| Testis                           | 207 | 14232 | 84   |
| Thyroid                          | 365 | 7750  | 270  |
| Uterus                           | 93  | 7447  | 2257 |
| Vagina                           | 99  | 7680  | 582  |
| Whole Blood                      | 281 | 4185  | 377  |

---

**Supplementary Table S2. Number of tissues and percentage of TFBS discovery rate for each TF.**

| <b>TF</b> | <b>Number of Tissue in ENCODE</b> | <b>Percentage of co-expressed eRNA with TFBS</b> |
|-----------|-----------------------------------|--------------------------------------------------|
| ADNP      | 1                                 | 97.15                                            |
| AEBP2     | 1                                 | 97.78                                            |
| AFF1      | 1                                 | 97.16                                            |
| AHR       | 1                                 | 97.19                                            |
| ARID2     | 1                                 | 96.38                                            |
| ARNT      | 4                                 | 92.62                                            |
| ATF1      | 2                                 | 91.55                                            |
| ATF2      | 5                                 | 91.70                                            |
| ATF3      | 6                                 | 93.51                                            |
| ATF4      | 1                                 | 91.06                                            |
| ATF7      | 4                                 | 91.51                                            |
| BACH1     | 3                                 | 90.61                                            |
| BATF      | 1                                 | 87.60                                            |
| BCL11A    | 3                                 | 87.92                                            |
| BCL11B    | 1                                 | 87.56                                            |
| BCL6      | 1                                 | 88.90                                            |
| BCL6B     | 1                                 | 90.51                                            |
| BDP1      | 2                                 | 89.18                                            |
| BHLHE40   | 6                                 | 89.70                                            |
| CDC5L     | 1                                 | 83.45                                            |
| CEBPB     | 7                                 | 83.37                                            |
| CEBPG     | 3                                 | 81.26                                            |
| CLOCK     | 1                                 | 76.33                                            |
| CREB1     | 3                                 | 76.68                                            |
| CREB3     | 1                                 | 74.46                                            |
| CREB3L1   | 1                                 | 74.38                                            |
| CREBBP    | 1                                 | 73.70                                            |
| CREM      | 3                                 | 74.89                                            |
| CSDE1     | 2                                 | 74.08                                            |
| CTCF      | 142                               | 99.46                                            |
| CTCFL     | 1                                 | 69.56                                            |
| CUX1      | 3                                 | 72.72                                            |
| DEAF1     | 1                                 | 67.80                                            |
| DPF2      | 3                                 | 65.60                                            |
| E2F1      | 3                                 | 64.62                                            |
| E2F4      | 5                                 | 62.83                                            |
| E2F5      | 1                                 | 64.42                                            |
| E2F6      | 2                                 | 63.40                                            |
| E2F7      | 1                                 | 62.53                                            |
| E2F8      | 3                                 | 60.18                                            |

|         |    |       |
|---------|----|-------|
| E4F1    | 3  | 58.09 |
| EGR1    | 4  | 58.57 |
| EGR2    | 1  | 57.49 |
| ELF1    | 5  | 57.77 |
| ELF3    | 1  | 55.08 |
| ELF4    | 2  | 55.58 |
| ELK1    | 6  | 55.60 |
| ELK4    | 2  | 57.32 |
| EP300   | 20 | 99.31 |
| ERF     | 1  | 55.23 |
| ESR1    | 2  | 55.70 |
| ESRRA   | 5  | 53.01 |
| ETS1    | 5  | 55.06 |
| ETS2    | 1  | 55.63 |
| ETV1    | 1  | 56.06 |
| ETV4    | 1  | 54.43 |
| ETV5    | 1  | 54.75 |
| ETV6    | 2  | 55.14 |
| FEZF1   | 1  | 51.48 |
| FOS     | 7  | 53.30 |
| FOSL1   | 2  | 51.30 |
| FOSL2   | 3  | 52.67 |
| FOXA1   | 8  | 52.09 |
| FOXA2   | 2  | 51.61 |
| FOXA3   | 1  | 49.21 |
| FOXJ2   | 1  | 49.61 |
| FOXK2   | 5  | 48.79 |
| FOXM1   | 3  | 42.18 |
| FOXP1   | 1  | 44.17 |
| FOXP2   | 2  | 41.92 |
| GABPA   | 9  | 41.32 |
| GATA1   | 2  | 38.81 |
| GATA2   | 3  | 37.85 |
| GATA3   | 3  | 38.88 |
| GATA4   | 1  | 39.56 |
| GATAD1  | 1  | 37.81 |
| GATAD2A | 2  | 37.69 |
| GATAD2B | 3  | 38.40 |
| GFI1B   | 1  | 35.90 |
| GLI2    | 1  | 37.48 |
| GLI4    | 1  | 34.93 |
| GLIS1   | 1  | 35.68 |
| GLIS2   | 1  | 37.36 |
| GMEB1   | 1  | 36.39 |

|        |    |       |
|--------|----|-------|
| GMEB2  | 1  | 35.99 |
| HES1   | 2  | 29.79 |
| HHEX   | 1  | 29.10 |
| HIC1   | 1  | 29.83 |
| HINFP  | 1  | 27.08 |
| HLF    | 1  | 27.83 |
| HMBOX1 | 1  | 27.20 |
| HNF1A  | 1  | 25.58 |
| HNF4A  | 2  | 25.95 |
| HNF4G  | 2  | 25.97 |
| HOMEZ  | 1  | 24.84 |
| ID3    | 1  | 24.64 |
| IKZF1  | 3  | 24.73 |
| IKZF2  | 1  | 25.18 |
| IKZF3  | 1  | 24.64 |
| IKZF5  | 1  | 24.84 |
| INSM2  | 1  | 24.68 |
| IRF1   | 1  | 24.79 |
| IRF2   | 2  | 24.33 |
| IRF3   | 4  | 23.71 |
| IRF4   | 1  | 14.63 |
| IRF5   | 1  | 14.42 |
| IRF9   | 1  | 14.28 |
| JUN    | 7  | 15.06 |
| JUNB   | 2  | 14.84 |
| JUND   | 10 | 14.55 |
| KAT7   | 1  | 15.48 |
| KDM5A  | 3  | 24.29 |
| KDM5B  | 1  | 38.59 |
| KLF1   | 2  | 14.00 |
| KLF10  | 1  | 14.03 |
| KLF11  | 1  | 13.93 |
| KLF13  | 1  | 13.58 |
| KLF16  | 3  | 13.46 |
| KLF17  | 1  | 14.79 |
| KLF4   | 1  | 14.84 |
| KLF5   | 1  | 14.40 |
| KLF7   | 1  | 14.33 |
| KLF9   | 3  | 15.07 |
| LCORL  | 1  | 14.96 |
| MAFF   | 3  | 15.29 |
| MAFG   | 1  | 14.86 |
| MAFK   | 8  | 14.88 |
| MAX    | 9  | 14.60 |

|         |    |       |
|---------|----|-------|
| MAZ     | 8  | 14.01 |
| MBD1    | 1  | 14.51 |
| MBD2    | 2  | 15.08 |
| MBD4    | 1  | 14.66 |
| MEF2A   | 2  | 15.03 |
| MEF2B   | 1  | 11.96 |
| MEF2C   | 1  | 12.60 |
| MEF2D   | 1  | 12.49 |
| MEIS2   | 1  | 12.29 |
| MGA     | 1  | 12.25 |
| MITF    | 1  | 11.46 |
| MIXL1   | 1  | 10.99 |
| MLX     | 1  | 10.86 |
| MNT     | 3  | 10.78 |
| MTA1    | 2  | 9.30  |
| MTA2    | 3  | 9.33  |
| MXD4    | 1  | 8.44  |
| MXI1    | 8  | 8.84  |
| MYB     | 1  | 9.32  |
| MYBL2   | 2  | 9.06  |
| MYC     | 10 | 27.98 |
| MYNN    | 2  | 8.09  |
| MYRF    | 1  | 7.54  |
| MZF1    | 1  | 7.37  |
| NANOG   | 2  | 7.34  |
| NCOA1   | 1  | 7.59  |
| NCOA2   | 1  | 7.31  |
| NCOA3   | 1  | 7.31  |
| NCOR1   | 2  | 6.49  |
| NEUROD1 | 2  | 6.02  |
| NFATC1  | 1  | 6.43  |
| NFATC3  | 2  | 5.87  |
| NFE2    | 1  | 5.70  |
| NFE2L1  | 1  | 5.83  |
| NFE2L2  | 4  | 5.77  |
| NFIL3   | 1  | 5.75  |
| NFXL1   | 3  | 4.46  |
| NFYA    | 3  | 4.22  |
| NR2C1   | 2  | 4.17  |
| NR2C2   | 4  | 3.70  |
| NR2F1   | 3  | 4.09  |
| NR2F2   | 2  | 4.12  |
| NR2F6   | 2  | 3.88  |
| NR3C1   | 4  | 3.88  |

|        |    |       |
|--------|----|-------|
| NR4A1  | 1  | 4.20  |
| NUFIP1 | 1  | 4.09  |
| OSR2   | 1  | 3.90  |
| OVOL3  | 1  | 3.25  |
| PATZ1  | 1  | 3.88  |
| PAX5   | 3  | 3.71  |
| PAX8   | 2  | 3.54  |
| PBX2   | 2  | 3.53  |
| PBX3   | 1  | 3.43  |
| PHF20  | 1  | 3.27  |
| PKNOX1 | 4  | 3.06  |
| POU2F2 | 2  | 2.28  |
| POU5F1 | 3  | 2.26  |
| PPARG  | 1  | 2.37  |
| PRDM1  | 2  | 1.96  |
| PRDM10 | 2  | 1.77  |
| PRDM2  | 1  | 1.81  |
| PRDM4  | 1  | 1.82  |
| RARA   | 1  | 1.75  |
| RBAK   | 1  | 1.41  |
| RBPJ   | 1  | 1.10  |
| RCOR1  | 8  | 1.03  |
| RCOR2  | 1  | 1.21  |
| RELA   | 5  | 1.17  |
| RELB   | 1  | 1.19  |
| REPIN1 | 1  | 0.39  |
| RERE   | 1  | 0.32  |
| REST   | 13 | 66.28 |
| RFX1   | 3  | 0.30  |
| RFX3   | 1  | 0.26  |
| RFX5   | 9  | 0.26  |
| RLF    | 1  | 0.03  |
| RUNX1  | 1  | 0.02  |
| RUNX3  | 1  | 99.30 |
| RXRB   | 1  | 98.04 |
| SALL2  | 1  | 94.29 |
| SCRT1  | 1  | 91.83 |
| SCRT2  | 1  | 91.44 |
| SETDB1 | 2  | 93.17 |
| SIX4   | 1  | 93.09 |
| SIX5   | 4  | 89.43 |
| SMAD1  | 2  | 90.44 |
| SMAD2  | 1  | 91.08 |
| SMAD4  | 1  | 90.70 |

|         |    |       |
|---------|----|-------|
| SMARCC1 | 1  | 84.77 |
| SMARCC2 | 3  | 83.22 |
| SP1     | 8  | 82.42 |
| SP2     | 4  | 79.76 |
| SP3     | 1  | 81.49 |
| SP4     | 1  | 79.28 |
| SP5     | 1  | 78.07 |
| SP7     | 1  | 78.72 |
| SPI1    | 4  | 79.10 |
| SREBF1  | 5  | 77.90 |
| SREBF2  | 4  | 76.43 |
| SRF     | 4  | 77.04 |
| STAT1   | 3  | 76.78 |
| STAT2   | 1  | 76.04 |
| STAT3   | 3  | 76.96 |
| STAT5A  | 2  | 75.31 |
| TAL1    | 1  | 71.14 |
| TBX21   | 1  | 65.15 |
| TBX3    | 1  | 65.39 |
| TCF12   | 5  | 65.78 |
| TCF3    | 1  | 62.17 |
| TEAD1   | 1  | 65.61 |
| TEAD2   | 1  | 62.85 |
| TEAD3   | 1  | 59.50 |
| TEAD4   | 3  | 61.53 |
| TFAP4   | 1  | 59.98 |
| TFDP1   | 2  | 61.31 |
| TFE3    | 1  | 59.69 |
| TGIF2   | 1  | 60.45 |
| THRA    | 1  | 59.09 |
| THRB    | 1  | 55.84 |
| TSHZ1   | 1  | 53.18 |
| USF1    | 6  | 47.53 |
| USF2    | 8  | 45.90 |
| VEZF1   | 1  | 48.40 |
| WT1     | 1  | 45.24 |
| YBX1    | 4  | 44.92 |
| YBX3    | 1  | 45.54 |
| YY1     | 11 | 42.73 |
| ZBED1   | 2  | 42.33 |
| ZBTB1   | 2  | 42.55 |
| ZBTB10  | 1  | 44.05 |
| ZBTB11  | 3  | 43.07 |
| ZBTB12  | 1  | 39.89 |



|         |   |       |
|---------|---|-------|
| ZBTB17  | 1 | 38.73 |
| ZBTB2   | 1 | 39.63 |
| ZBTB20  | 1 | 39.91 |
| ZBTB21  | 1 | 40.97 |
| ZBTB25  | 1 | 38.95 |
| ZBTB26  | 2 | 38.64 |
| ZBTB33  | 7 | 39.29 |
| ZBTB40  | 4 | 38.56 |
| ZBTB44  | 1 | 39.18 |
| ZBTB48  | 1 | 37.46 |
| ZBTB49  | 1 | 38.12 |
| ZBTB5   | 1 | 38.92 |
| ZBTB6   | 1 | 38.82 |
| ZBTB7A  | 3 | 37.35 |
| ZBTB7B  | 1 | 38.35 |
| ZBTB8A  | 2 | 38.89 |
| ZEB1    | 3 | 39.87 |
| ZEB2    | 2 | 38.88 |
| ZFP3    | 1 | 36.39 |
| ZFP37   | 1 | 37.06 |
| ZFP41   | 1 | 35.59 |
| ZFP64   | 1 | 36.40 |
| ZFP69B  | 1 | 36.40 |
| ZFP91   | 1 | 38.23 |
| ZFX     | 6 | 36.57 |
| ZHX1    | 2 | 37.21 |
| ZHX2    | 2 | 35.89 |
| ZIC2    | 1 | 34.66 |
| ZKSCAN1 | 4 | 34.32 |
| ZKSCAN8 | 2 | 34.53 |
| ZMIZ1   | 1 | 31.88 |
| ZNF10   | 1 | 32.05 |
| ZNF112  | 1 | 31.99 |
| ZNF114  | 1 | 32.12 |
| ZNF121  | 1 | 31.80 |
| ZNF132  | 1 | 31.17 |
| ZNF133  | 1 | 30.22 |
| ZNF138  | 1 | 31.44 |
| ZNF140  | 1 | 30.80 |
| ZNF143  | 4 | 32.12 |
| ZNF148  | 2 | 31.49 |
| ZNF155  | 1 | 31.54 |
| ZNF157  | 1 | 29.96 |
| ZNF16   | 1 | 30.23 |

|         |   |       |
|---------|---|-------|
| ZNF169  | 1 | 30.03 |
| ZNF174  | 1 | 27.25 |
| ZNF175  | 2 | 26.72 |
| ZNF18   | 1 | 26.55 |
| ZNF184  | 2 | 27.00 |
| ZNF189  | 1 | 27.38 |
| ZNF19   | 1 | 26.69 |
| ZNF197  | 1 | 26.72 |
| ZNF2    | 1 | 26.15 |
| ZNF202  | 1 | 25.62 |
| ZNF205  | 1 | 25.12 |
| ZNF207  | 3 | 26.35 |
| ZNF211  | 1 | 25.04 |
| ZNF214  | 1 | 25.69 |
| ZNF217  | 2 | 25.70 |
| ZNF221  | 1 | 26.18 |
| ZNF23   | 1 | 25.95 |
| ZNF239  | 1 | 24.78 |
| ZNF24   | 5 | 25.19 |
| ZNF248  | 1 | 24.64 |
| ZNF26   | 1 | 25.53 |
| ZNF263  | 2 | 23.70 |
| ZNF266  | 1 | 23.56 |
| ZNF274  | 7 | 23.49 |
| ZNF280D | 1 | 22.69 |
| ZNF282  | 2 | 21.42 |
| ZNF292  | 1 | 22.65 |
| ZNF3    | 2 | 22.19 |
| ZNF311  | 1 | 21.44 |
| ZNF324  | 1 | 21.66 |
| ZNF335  | 1 | 19.22 |
| ZNF34   | 1 | 19.66 |
| ZNF341  | 1 | 18.59 |
| ZNF350  | 1 | 20.04 |
| ZNF354B | 1 | 18.50 |
| ZNF354C | 1 | 18.88 |
| ZNF362  | 1 | 18.26 |
| ZNF366  | 1 | 98.69 |
| ZNF37A  | 1 | 98.52 |
| ZNF384  | 4 | 98.44 |
| ZNF391  | 1 | 97.51 |
| ZNF394  | 1 | 97.28 |
| ZNF398  | 1 | 96.62 |
| ZNF404  | 1 | 95.92 |

|         |   |       |
|---------|---|-------|
| ZNF407  | 1 | 92.63 |
| ZNF416  | 1 | 90.22 |
| ZNF423  | 1 | 91.29 |
| ZNF426  | 1 | 91.09 |
| ZNF433  | 1 | 91.34 |
| ZNF444  | 1 | 89.03 |
| ZNF449  | 1 | 90.69 |
| ZNF473  | 1 | 89.26 |
| ZNF48   | 2 | 88.21 |
| ZNF488  | 1 | 88.89 |
| ZNF501  | 1 | 90.32 |
| ZNF507  | 2 | 89.64 |
| ZNF510  | 1 | 87.76 |
| ZNF512  | 1 | 87.73 |
| ZNF512B | 1 | 86.62 |
| ZNF513  | 1 | 85.45 |
| ZNF514  | 1 | 85.51 |
| ZNF521  | 1 | 83.64 |
| ZNF529  | 1 | 81.46 |
| ZNF530  | 1 | 80.25 |
| ZNF544  | 1 | 74.27 |
| ZNF547  | 1 | 74.37 |
| ZNF548  | 1 | 75.57 |
| ZNF549  | 1 | 74.60 |
| ZNF555  | 1 | 74.93 |
| ZNF558  | 1 | 75.24 |
| ZNF560  | 1 | 77.58 |
| ZNF561  | 1 | 75.21 |
| ZNF571  | 1 | 74.15 |
| ZNF574  | 1 | 72.63 |
| ZNF579  | 1 | 71.78 |
| ZNF580  | 2 | 71.90 |
| ZNF584  | 1 | 72.52 |
| ZNF589  | 1 | 65.15 |
| ZNF592  | 3 | 64.83 |
| ZNF596  | 1 | 65.92 |
| ZNF600  | 1 | 65.80 |
| ZNF610  | 1 | 63.98 |
| ZNF614  | 1 | 62.67 |
| ZNF621  | 1 | 62.33 |
| ZNF624  | 1 | 62.18 |
| ZNF629  | 1 | 55.98 |
| ZNF639  | 2 | 57.27 |
| ZNF644  | 2 | 57.02 |

|         |   |       |
|---------|---|-------|
| ZNF645  | 1 | 52.78 |
| ZNF652  | 1 | 55.30 |
| ZNF658  | 1 | 54.76 |
| ZNF660  | 1 | 54.68 |
| ZNF664  | 1 | 55.22 |
| ZNF670  | 1 | 53.86 |
| ZNF677  | 1 | 52.43 |
| ZNF680  | 1 | 53.26 |
| ZNF687  | 2 | 50.79 |
| ZNF692  | 1 | 49.84 |
| ZNF7    | 1 | 50.18 |
| ZNF701  | 1 | 47.77 |
| ZNF704  | 1 | 48.19 |
| ZNF707  | 1 | 45.36 |
| ZNF76   | 1 | 44.36 |
| ZNF766  | 1 | 45.33 |
| ZNF768  | 1 | 43.43 |
| ZNF770  | 1 | 46.77 |
| ZNF776  | 1 | 45.17 |
| ZNF777  | 1 | 44.66 |
| ZNF785  | 1 | 44.76 |
| ZNF791  | 1 | 42.31 |
| ZNF83   | 1 | 41.59 |
| ZNF843  | 1 | 41.45 |
| ZSCAN16 | 1 | 40.68 |
| ZSCAN18 | 1 | 41.28 |
| ZSCAN21 | 1 | 41.27 |
| ZSCAN23 | 1 | 41.90 |
| ZSCAN29 | 2 | 40.47 |
| ZSCAN30 | 1 | 40.44 |
| ZSCAN4  | 1 | 39.54 |
| ZSCAN5A | 1 | 39.49 |
| ZSCAN5C | 1 | 37.27 |
| ZSCAN9  | 1 | 39.96 |
| ZXDB    | 1 | 41.24 |

---
